# Supplementary material
Source: Research Square preprint supplement (doi:10.21203/rs.3.rs-9784587/v1)
Supplement: Supplementary file 1 [file 257b1f087990019a9cd54c95.pdf]

## **INFLUENCE OF SEX AND TIME ON CARDIAC REMODELING INDUCED BY VITAMIN D SUPPLEMENTATION**

Matheus Augusto Callegari<sup>1\*</sup>, Priscila Portugal dos Santos<sup>1</sup>, Marina Gaiato Monte, Mariana de Souza Dorna<sup>1</sup>, Carolina Rodrigues Tonon<sup>1</sup>, Marcos Ferreira Minicucci<sup>1</sup>, Leonardo Antonio Mamede Zornoff<sup>1</sup>, Paula Schmidt Azevedo<sup>1</sup>, Bertha Furlan Polegato<sup>1</sup>, Sergio Alberto Rupp de Paiva<sup>1</sup>

<sup>1</sup> Department of Internal Medicine, Botucatu Medical School, São Paulo State University-UNESP, Botucatu, Brazil

\*CORRESPONDENCE: Matheus Augusto Callegari, Department of Internal Medicine, Botucatu Medical School, UNESP, Rubião Júnior s/n, Botucatu, SP 18618-970, Brazil. ORCID: 0000-0001-9557-3968. Email: m.callegari@unesp.br

\*SUPPLEMENTARY MATERIAL\*



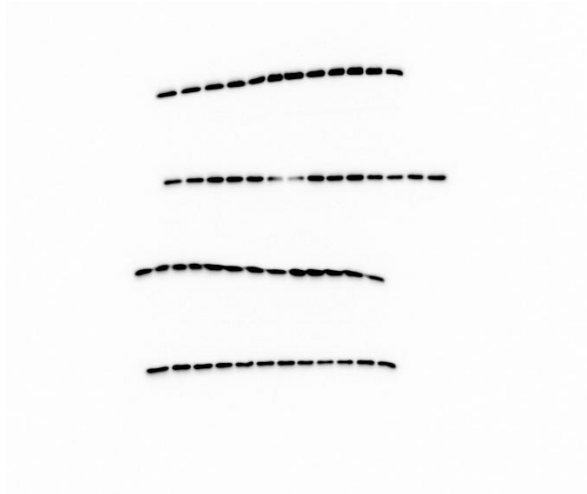

Supplementary Figure 1 - Original Western blot images of Glutathione Peroxidase 1 (Molecular weight: 23 kDa) from membranes 2, 5, 3 and 4, respectively. Samples obtained after extraction with RIPA buffer from left ventricular tissue, as described in the Methods section. Lateral membrane edges are not fully visible due to imaging conditions and white background.

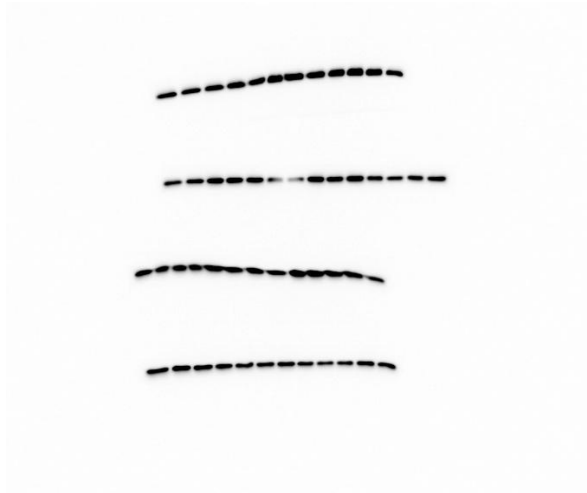

Supplementary Figure 2 - Original Western blot images of Glutathione Peroxidase 1 (Molecular weight: 23 kDa) from membranes 7, 1, 6 and 8, respectively. Samples obtained after extraction with RIPA buffer from left ventricular tissue, as described in the Methods section. Lateral membrane edges are not fully visible due to imaging conditions and white background.

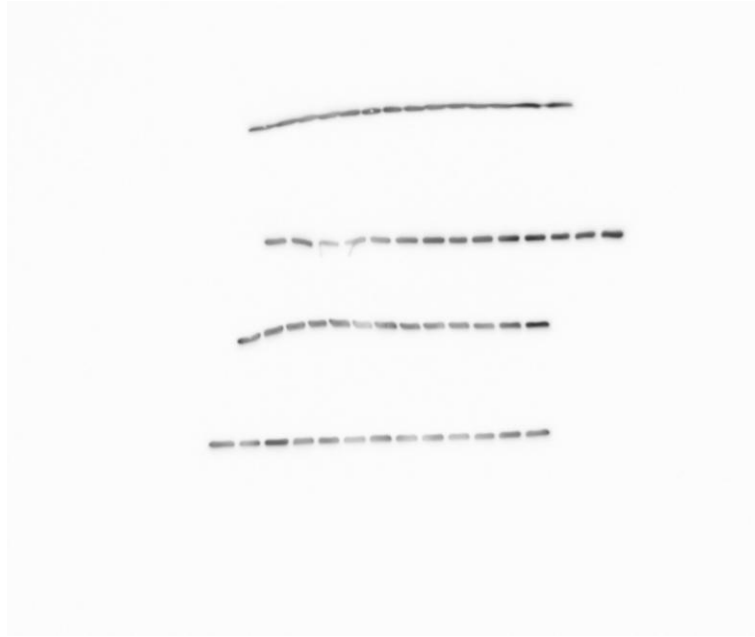

Supplementary Figure 3 - Original Western blot images of GAPDH (Molecular weight: 37 kDa) used for Glutathione Peroxidase 1 normalization. Membranes 5, 2, 3 and 4, respectively. Samples obtained after extraction with RIPA buffer from left ventricular tissue, as described in the Methods section. Lateral membrane edges are not fully visible due to imaging conditions and white background.

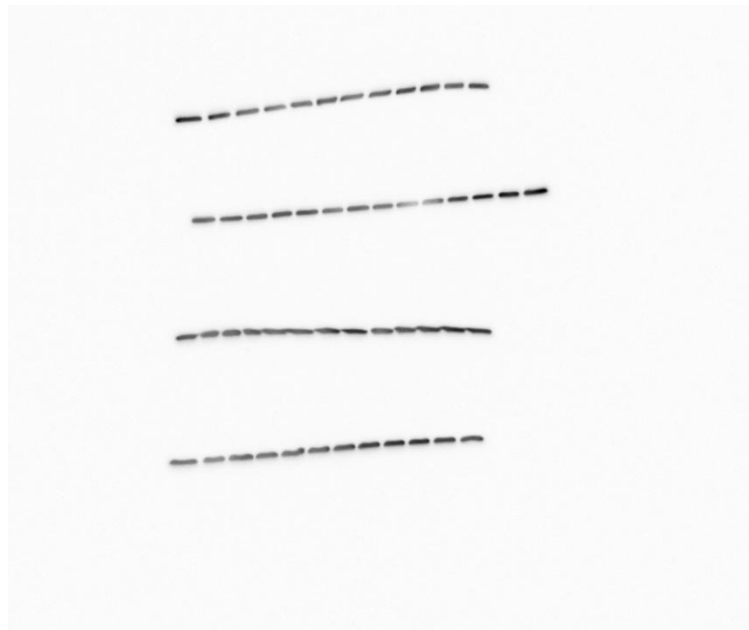

Supplementary Figure 4 - Original Western blot images of GAPDH (Molecular weight: 37 kDa) used for Glutathione Peroxidase 1 normalization. Membranes 7, 1, 6 and 2, respectively. Samples obtained after extraction with RIPA buffer from left ventricular tissue, as described in the Methods section. Lateral membrane edges are not fully visible due to imaging conditions and white background.

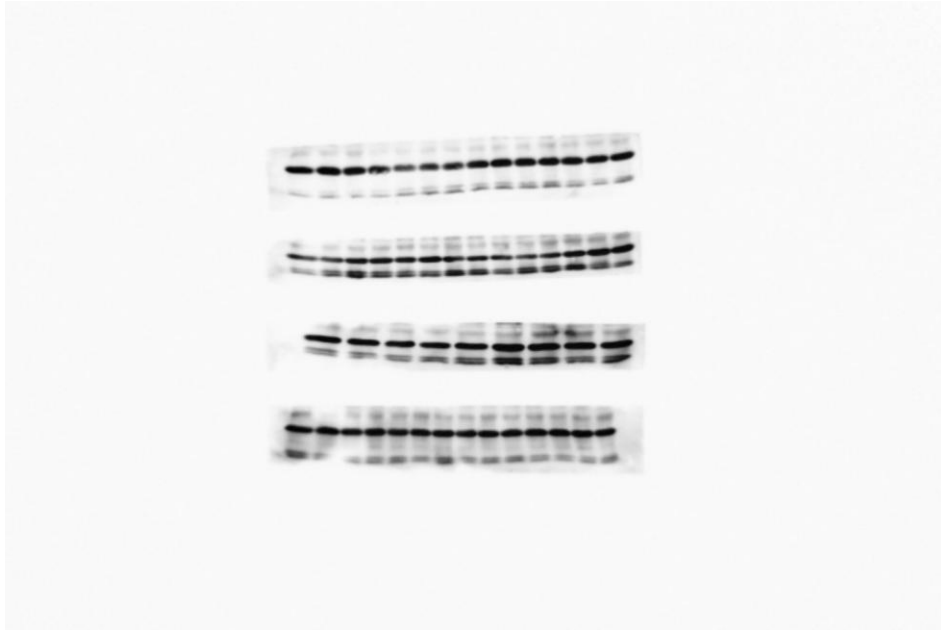

Supplementary Figure 5 - Original Western blot images of p-IκB-α (Molecular weight: 41 kDa) from membranes 2, 5, 6 and 1, respectively. Samples obtained after extraction with RIPA buffer from left ventricular tissue, as described in the Methods section. Lateral membrane edges are not fully visible due to imaging conditions and white background.

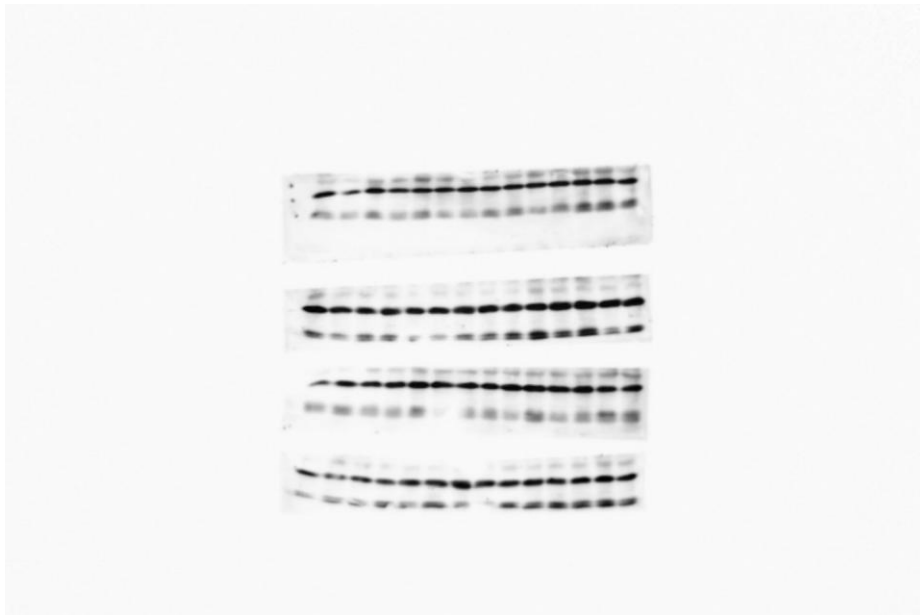

Supplementary Figure 6 - Original Western blot images of p-IκB-α (Molecular weight: 41 kDa) from membranes 4, 7, 3 and 8, respectively. Samples obtained after extraction with RIPA buffer from left ventricular tissue, as described in the Methods section.

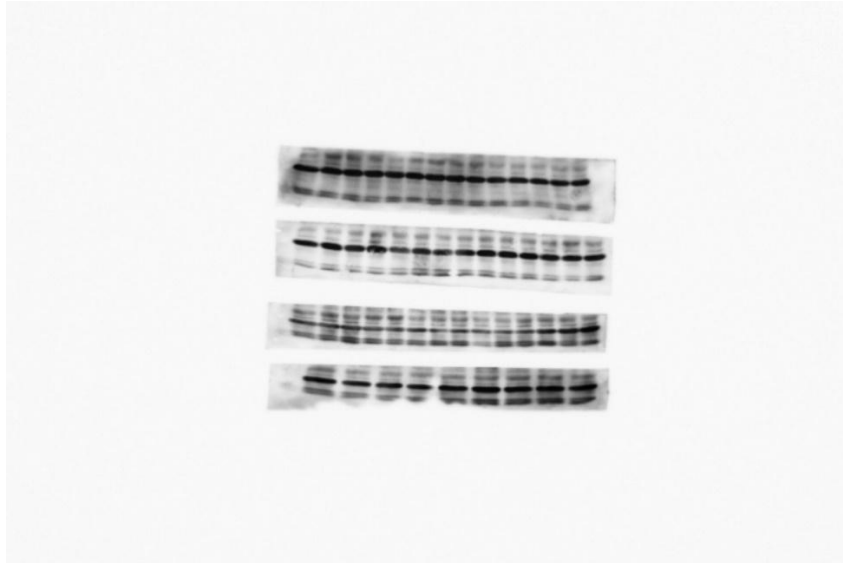

Supplementary Figure 7 - Original Western blot images of Ikb-alpha (Molecular weight: 38 kDa) from membranes 1, 2, 5 and 6, respectively. Samples obtained after extraction with RIPA buffer from left ventricular tissue, as described in the Methods section.

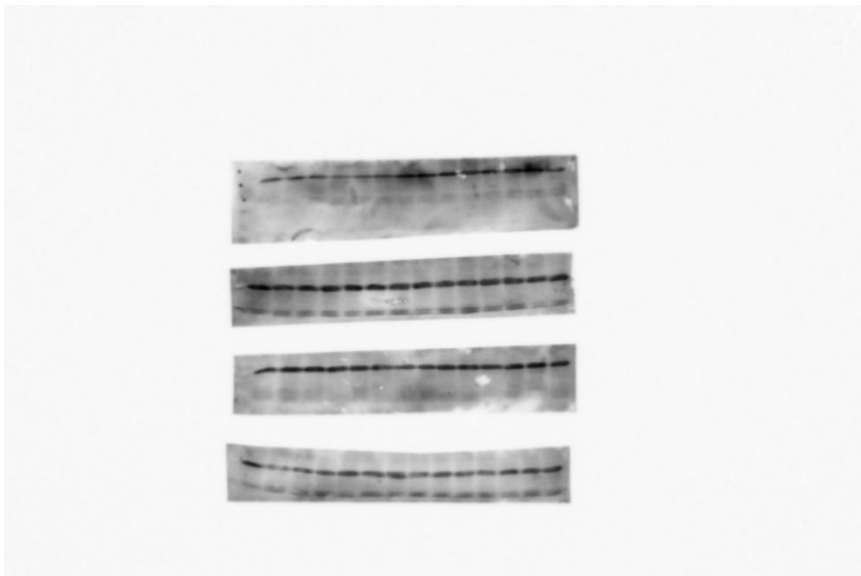

Supplementary Figure 8 - Original Western blot images of Ikb-alpha (Molecular weight: 38 kDa) from membranes 4, 7, 3 and 8, respectively. Samples obtained after extraction with RIPA buffer from left ventricular tissue, as described in the Methods section.

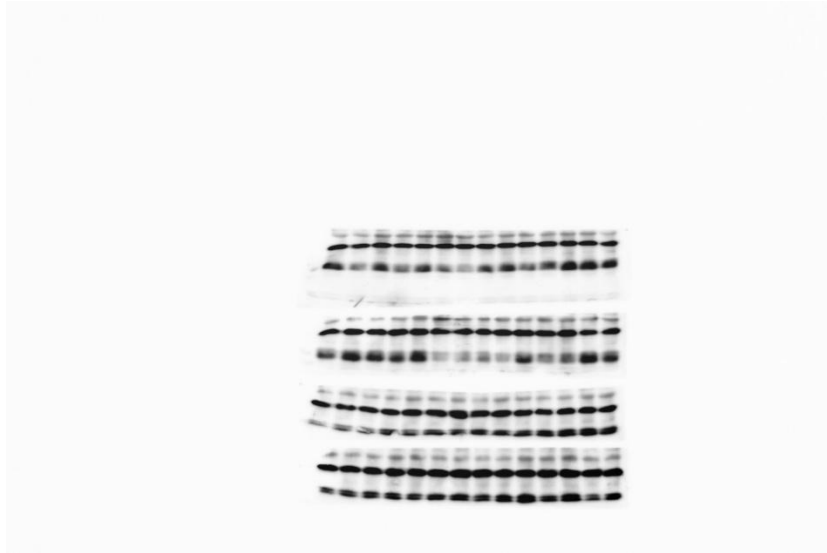

Supplementary Figure 9 - Original Western blot images of Heme oxygenase 1 (HO-1) (Molecular weight: 31 kDa) GAPDH (Molecular weight: 37 kDa) from membranes 4, 3, 8 and 7, respectively. Samples obtained after extraction with RIPA buffer from left ventricular tissue, as described in the Methods section. Lateral membrane edges are not fully visible due to imaging conditions and white background.

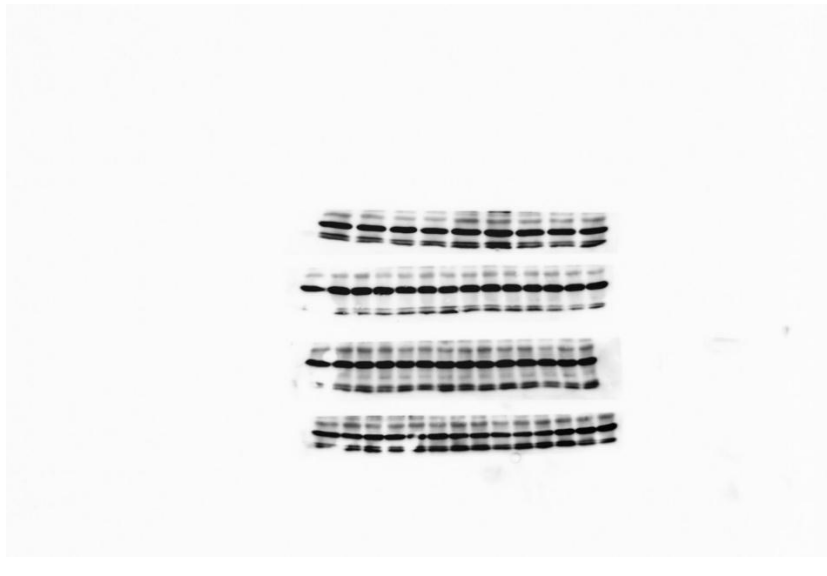

Supplementary Figure 10 - Original Western blot images of Heme oxygenase 1 (HO-1) (Molecular weight: 31 kDa) and GAPDH (Molecular weight: 37 kDa) from membranes 6, 2, 1 and 5, respectively. Samples obtained after extraction with RIPA buffer from left ventricular tissue, as described in the Methods section. Lateral membrane edges are not fully visible due to imaging conditions and white background.

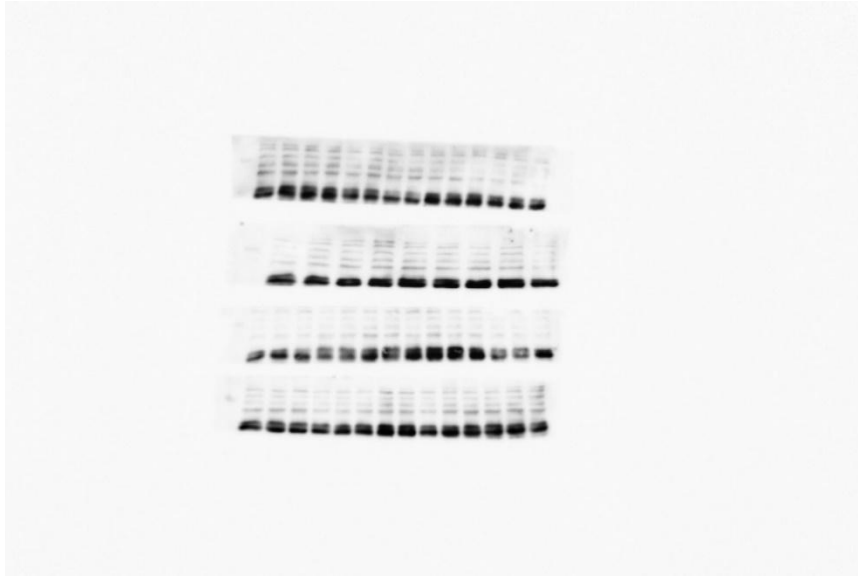

Supplementary Figure 11 - Original Western blot images of total NF- $\kappa$ B (Molecular weight: kDa) from membranes 1, 6, 2 and 5, respectively. Samples obtained after extraction with RIPA buffer from left ventricular tissue, as described in the Methods section. Lateral membrane edges are not fully visible due to imaging conditions and white background.

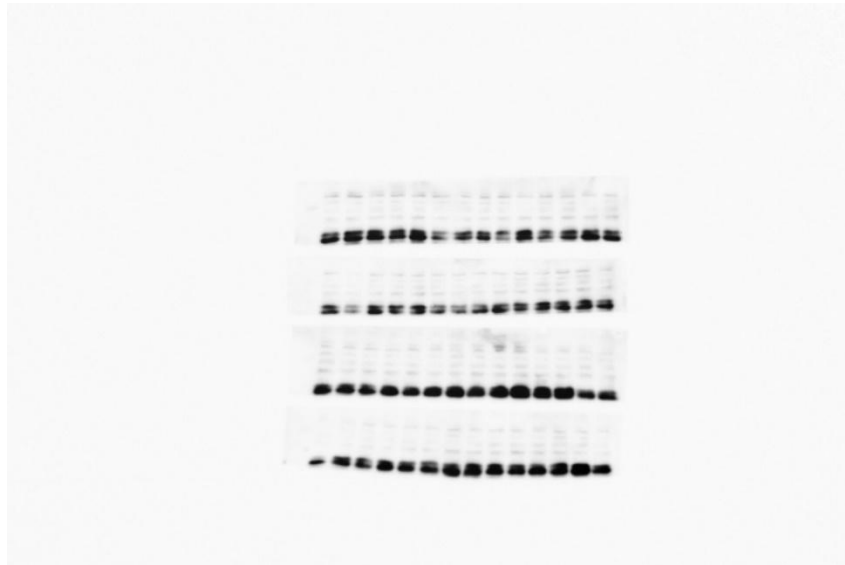

Supplementary Figure 12 - Original Western blot images of total NF- $\kappa$ B (Molecular weight: 65 kDa) from membranes 3, 4, 7 and 8, respectively. Samples obtained after extraction with RIPA buffer from left ventricular tissue, as described in the Methods section. Lateral membrane edges are not fully visible due to imaging conditions and white background.

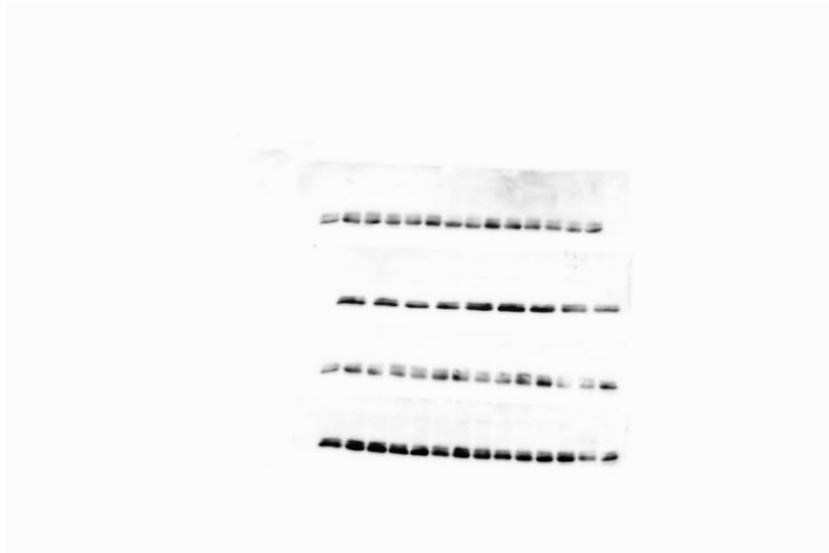

Supplementary Figure 13 - Original Western blot images of p-p65 NF- $\kappa$ B (Molecular weight: 65 kDa) from membranes 1, 6, 2 and 5, respectively. Samples obtained after extraction with RIPA buffer from left ventricular tissue, as described in the Methods section. Lateral membrane edges are not fully visible due to imaging conditions and white background.

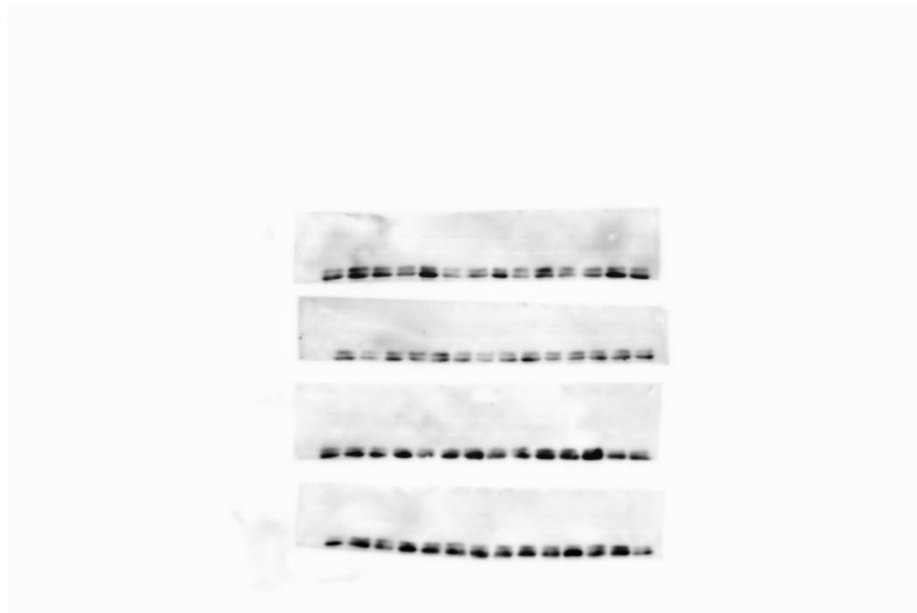

Supplementary Figure 14 - Original Western blot images of p-p65 NF- $\kappa$ B (Molecular weight: 65 kDa) from membranes 3, 4, 7 and 8, respectively. Samples obtained after extraction with RIPA buffer from left ventricular tissue, as described in the Methods section. Lateral membrane edges are not fully visible due to imaging conditions and white background.

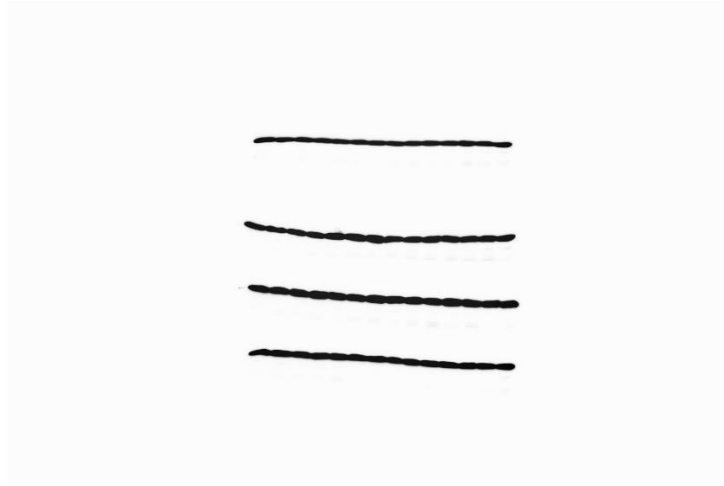

Supplementary Figure 15 - Original Western blot images of GAPDH (Molecular weight: 37 kDa) from membranes 4, 8, 7 and 3, respectively. Samples obtained after extraction with RIPA buffer from left ventricular tissue, as described in the Methods section. Lateral membrane edges are not fully visible due to imaging conditions and white background.

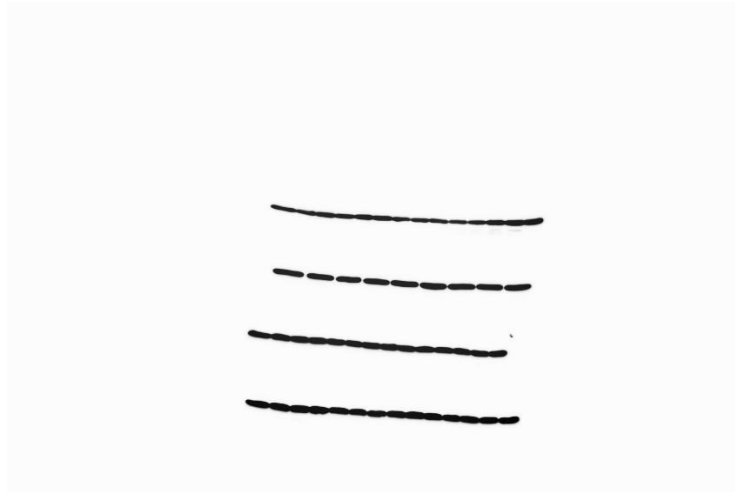

Supplementary Figure 16 - Original Western blot images of GAPDH (Molecular weight: 37 kDa) from membranes 5, 6, 1 and 2, respectively. Samples obtained after extraction with RIPA buffer from left ventricular tissue, as described in the Methods section. Lateral membrane edges are not fully visible due to imaging conditions and white background.
